# Supplementary material for: Improved dielectric stability of epoxy composites with ultralow boron nitride loading
Source: Royal Society of Chemistry journal article supplement (doi:10.1039/c8ra10211b), 2019-01-01
Supplement: c8ra10211b1.pdf [file c8ra10211b1.pdf]

**Improved dielectric stability of epoxy composites with ultralow  
boron nitride loading**

Xiuwu Fu, Yiping Guo\*, Qi Du, Lin Guan, Siboh He

*State Key Laboratory of Metal Matrix Composites, School of Materials Science and  
Engineering, Shanghai Jiao Tong University, Shanghai 200240, People's Republic of  
China*

*\*Email address: [ypguo@sjtu.edu.cn](mailto:ypguo@sjtu.edu.cn)*

*Tel.: 86-21-54738972, Fax: 86-21-34202749*

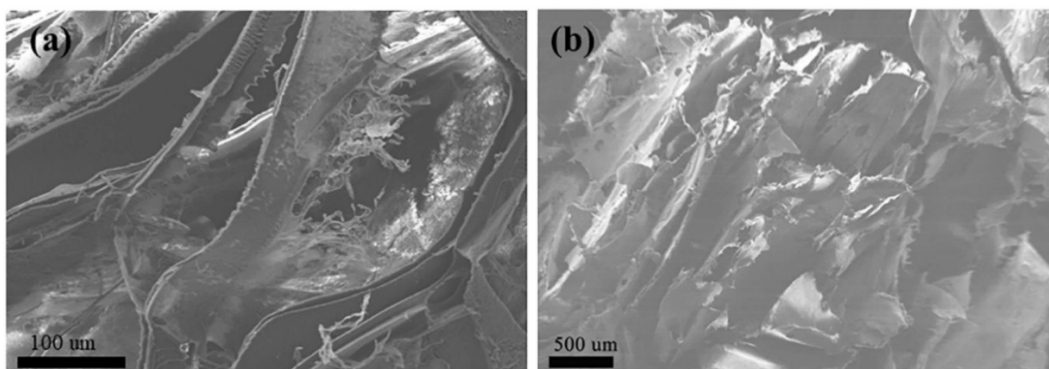

Fig. S1 the SEM image of the pristine PA66 aerogel

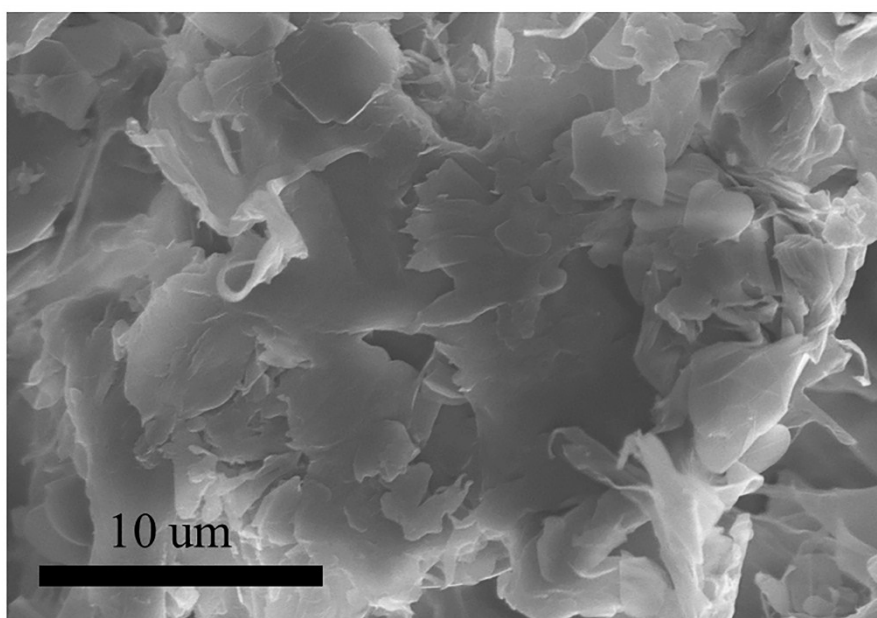

Fig. S2 the SEM image of the BN/PA66 aerogel

The BN microplatelets adhere to PA66 aerogel sheets to form a thermal conduction network.

**Table S1.** The conversion of volume fraction and volume fraction of the BN microplatelets in the whole composite.

| Sample            | Volume fraction (vol%) | Mass fraction (wt%) |
|-------------------|------------------------|---------------------|
| 3D BN/PA66-10-1   | 1                      | 2.3                 |
| 3D BN/PA66-20-2.5 | 2.5                    | 5                   |
| 3D BN/PA66-30-4   | 4                      | 7.4                 |
| 3D BN/PA66-40-6   | 6                      | 11.5                |

**Table.S2** the specific value of thermal conductivity ( $W m^{-1}K^{-1}$ ) of the neat epoxy, random BN/EP-4 composite and 3D PA66/BN composites over the temperature range 25-200°C

|                   | 25°C  | 50°C  | 75°C  | 100°C | 125°C | 150°C | 175°C | 200°C |
|-------------------|-------|-------|-------|-------|-------|-------|-------|-------|
| neat epoxy        | 0.130 | 0.124 | 0.106 | 0.08  | 0.075 | 0.073 | 0.070 | 0.069 |
| random BN/EP-4    | 0.191 | 0.198 | 0.216 | 0.194 | 0.188 | 0.187 | 0.187 | 0.189 |
| 3D BN/PA66-0-0    | 0.154 | 0.136 | 0.132 | 0.115 | 0.09  | 0.089 | 0.088 | 0.087 |
| 3D BN/PA66-10-1   | 0.313 | 0.316 | 0.330 | 0.316 | 0.297 | 0.286 | 0.280 | 0.280 |
| 3D BN/PA66-20-2.5 | 0.327 | 0.356 | 0.388 | 0.352 | 0.330 | 0.318 | 0.314 | 0.317 |
| 3D BN/PA66-30-4   | 0.596 | 0.639 | 0.656 | 0.631 | 0.578 | 0.555 | 0.538 | 0.530 |
| 3D BN/PA66-40-6   | 0.623 | 0.659 | 0.663 | 0.648 | 0.613 | 0.583 | 0.565 | 0.555 |

**Table.S3** The specific value of dielectric constant and dissipation factor of the neat epoxy, random BN/EP-4 composite and 3D PA66/BN composites at  $10^4$  Hz and room temperature

|                   | Dielectric constant | Dissipation factor |
|-------------------|---------------------|--------------------|
| neat epoxy        | 3.65                | 0.025              |
| random BN/EP-4    | 4.16                | 0.031              |
| 3D BN/PA66-0-0    | 3.75                | 0.034              |
| 3D BN/PA66-10-1   | 3.83                | 0.027              |
| 3D BN/PA66-20-2.5 | 4.08                | 0.029              |
| 3D BN/PA66-30-4   | 4.28                | 0.027              |
| 3D BN/PA66-40-6   | 4.49                | 0.030              |

**Table.S4** The specific value of dielectric constant and dissipation factor of neat epoxy, random BN/EP-4 composite and 3D PA66/BN composites at  $10^4$  Hz and  $200^\circ\text{C}$

|                   | Dielectric constant | Dissipation factor |
|-------------------|---------------------|--------------------|
| neat epoxy        | 5.40                | 0.141              |
| random BN/EP-4    | 5.74                | 0.094              |
| 3D BN/PA66-0-0    | 5.36                | 0.124              |
| 3D BN/PA66-10-1   | 5.37                | 0.117              |
| 3D BN/PA66-20-2.5 | 5.59                | 0.119              |
| 3D BN/PA66-30-4   | 4.54                | 0.044              |
| 3D BN/PA66-40-6   | 4.71                | 0.042              |
